# Supplementary material for: Photoinduced energy and charge transfer in a bis(triphenylamine)–BODIPY–C60artificial photosynthetic system
Source: Royal Society of Chemistry journal article supplement (doi:10.1039/c6ra06841c), 2016-01-01
Supplement: c6ra06841c1.pdf [file c6ra06841c1.pdf]

## Electronic Supplementary Information

### Photoinduced energy and charge transfer in bis(triphenylamine)-BODIPY- C<sub>60</sub> artificial photosynthetic system

Jian-Yong Liu\*, Xue-Ni Hou, Ye Tian, Lizhi Jiang, Shuiquan Deng,

Beate Röder and Eugeny A. Ermilov\*

#### Contents

- Fig. S1** Fluorescence spectra of triad **4** (*a*) and tetrad **6** (*b*) in polar DMF and nonpolar TOL upon excitation at 613 nm (BODIPY-part excitation). Optical density of the samples was adjusted to 0.1 at the BODIPY absorption maximum.
- Fig. S2** Fit of the  $\Delta$ OD signal at 550 nm of triad **4** solved in DMF (*a*) and TOL (*b*).
- Fig. S3** Fit of the  $\Delta$ OD signal at 550 nm of tetrad **6** solved in DMF (*a*) and TOL (*b*).
- Fig. S4** Differential pulse voltammetry of tetrad **6** in deaerated DMF in the presence of 0.1 M [*n*-Bu<sub>4</sub>N][ClO<sub>4</sub>]. Scan rate = 20 mV s<sup>-1</sup>.
- Table S1** Vertical transition wavelengths  $\lambda_{\text{max}}$  (nm), transition energies  $\Delta E$  (eV) and transition contributions calculated at TD-DFT B3LYP/(cc-pVDZ) level.
- Fig. S5** Energy level diagram showing the different photophysical events of tetrad **6** in TOL.
- Fig. S6** <sup>1</sup>H NMR spectrum of **3**.
- Fig. S7** <sup>13</sup>C {<sup>1</sup>H} NMR spectrum of **3**.
- Fig. S8** HRMS spectrum of **3**.
- Fig. S9** <sup>1</sup>H NMR spectrum of **4**.
- Fig. S10** <sup>13</sup>C {<sup>1</sup>H} NMR spectrum of **4**.
- Fig. S11** HRMS spectrum of **4**.
- Fig. S12** <sup>1</sup>H NMR spectrum of **5**.

**Fig. S13**  $^{13}\text{C}\{^1\text{H}\}$  NMR spectrum of **5**.

**Fig. S14** HRMS spectrum of **5**.

**Fig. S15**  $^1\text{H}$  NMR spectrum of **6**.

**Fig. S16** HRMS spectrum of **6**.

**Fig. S17**  $^1\text{H}$  NMR spectrum of **9**.

**Fig. S18** MS spectrum of **9**.

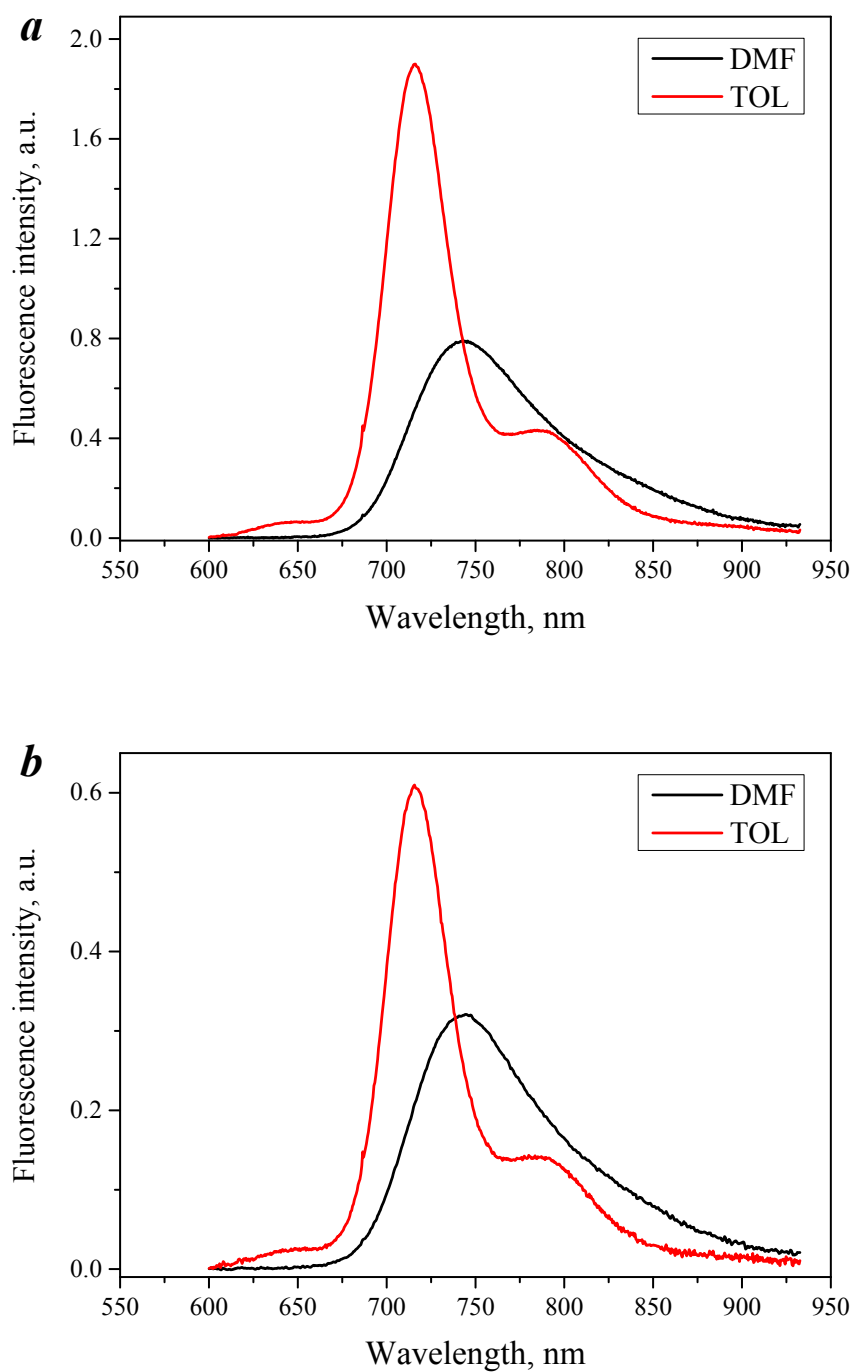

**Fig. S1** Fluorescence spectra of triad **4** (*a*) and tetrad **6** (*b*) in polar DMF and nonpolar TOL upon excitation at 613 nm (BODIPY-part excitation). Optical density of the samples was adjusted to 0.1 at the BODIPY absorption maximum

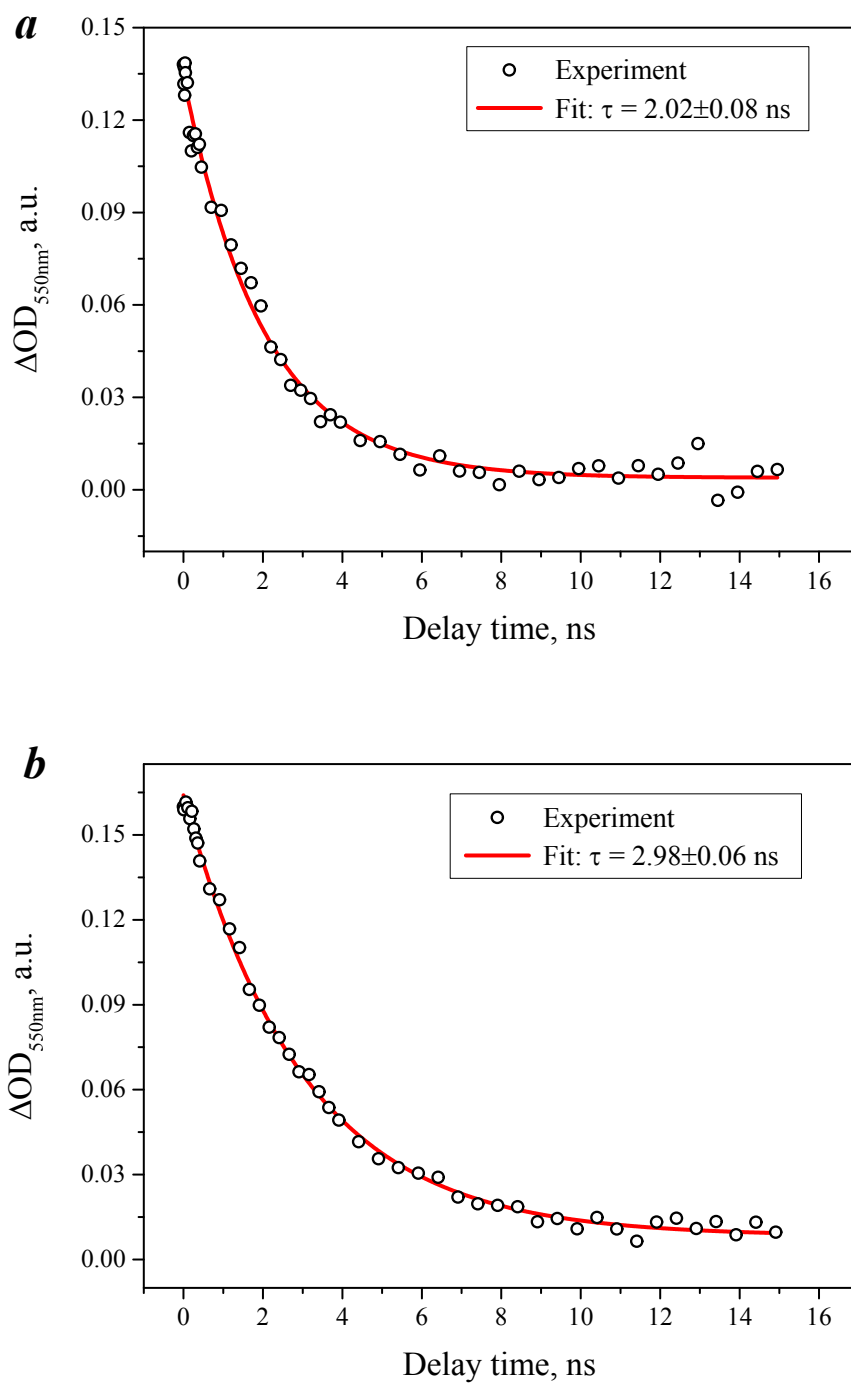

**Fig. S2** Fit of the  $\Delta OD$  signal at 550 nm of triad **4** solved in DMF (*a*) and TOL (*b*)

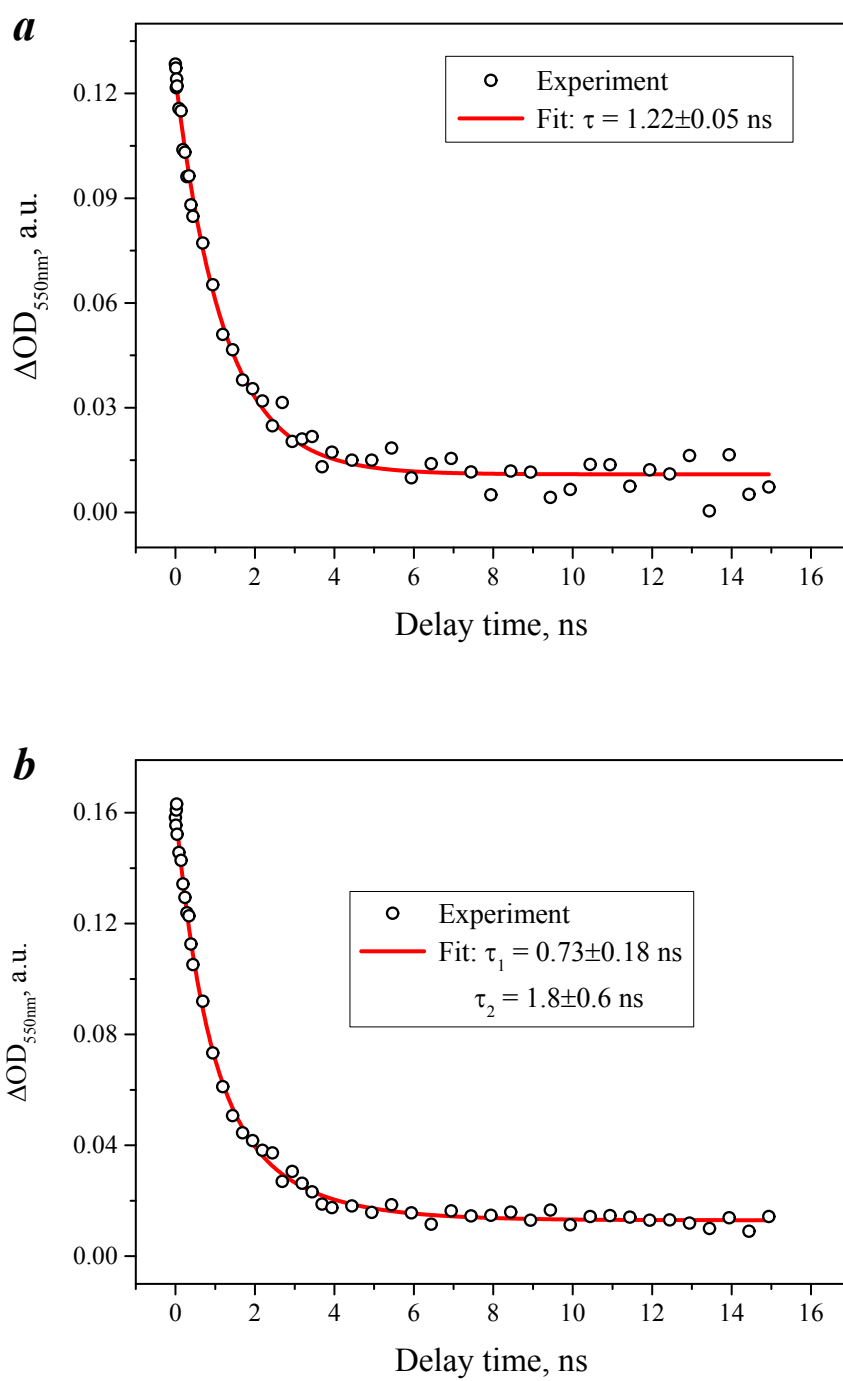

**Fig. S3** Fit of the  $\Delta OD$  signal at 550 nm of tetrad **6** solved in DMF (**a**) and TOL (**b**)

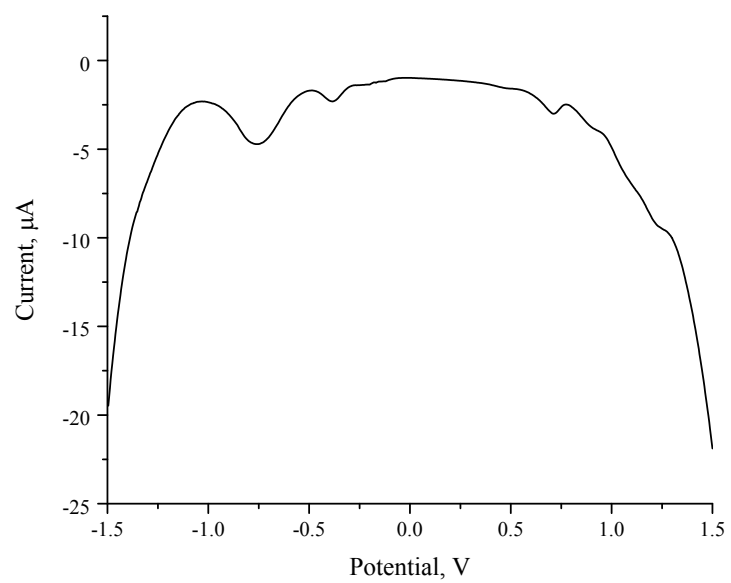

**Fig. S4** Differential pulse voltammetry of tetrad **6** in deaerated DMF in the presence of 0.1 M  $[n\text{-Bu}_4\text{N}][\text{ClO}_4]$ . Scan rate = 20  $\text{mV s}^{-1}$

**Table S1** Vertical transition wavelengths  $\lambda_{\max}$  (nm), transition energies  $\Delta E$  (eV) and transition contributions calculated at TD-DFT B3LYP/(cc-pVDZ) level

| Compound | $\lambda_{\max}$<br>(nm) | $\Delta E$<br>(eV) | Transitions<br>(contribution)                                                                         |
|----------|--------------------------|--------------------|-------------------------------------------------------------------------------------------------------|
| <b>2</b> | 535                      | 2.32               | HOMO $\rightarrow$ LUMO (100%)                                                                        |
|          | 387                      | 3.20               | HOMO-3 $\rightarrow$ LUMO (63%)<br>HOMO-1 $\rightarrow$ LUMO (36%)                                    |
|          |                          |                    |                                                                                                       |
| <b>4</b> | 708                      | 1.75               | HOMO $\rightarrow$ LUMO (99%)                                                                         |
|          | 561                      | 2.21               | HOMO-1 $\rightarrow$ LUMO (96%)                                                                       |
|          | 405                      | 3.06               | HOMO $\rightarrow$ LUMO+1 (71%)<br>HOMO-3 $\rightarrow$ LUMO (25%)                                    |
|          | 371                      | 3.34               | HOMO-3 $\rightarrow$ LUMO (41%)<br>HOMO-4 $\rightarrow$ LUMO (17%)<br>HOMO $\rightarrow$ LUMO+1 (16%) |
|          | 353                      | 3.51               | HOMO $\rightarrow$ LUMO+3 (38%)                                                                       |
| <b>6</b> | 712                      | 1.74               | HOMO $\rightarrow$ LUMO+3 (92%)                                                                       |
|          | 568                      | 2.18               | HOMO-1 $\rightarrow$ LUMO+3 (95%)                                                                     |

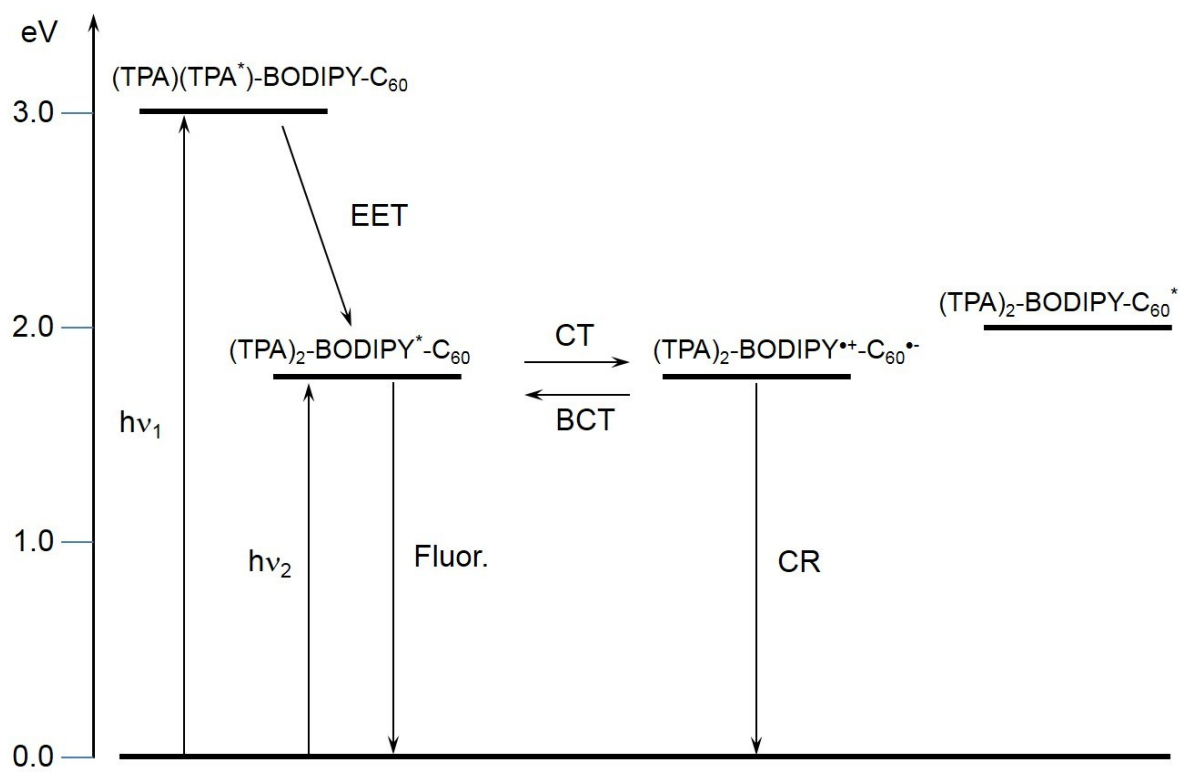

**Fig. S5** Energy level diagram showing the different photophysical events of tetrad **6** in TOL



In all of the following spectra, the residual solvent signals are marked with asterisks

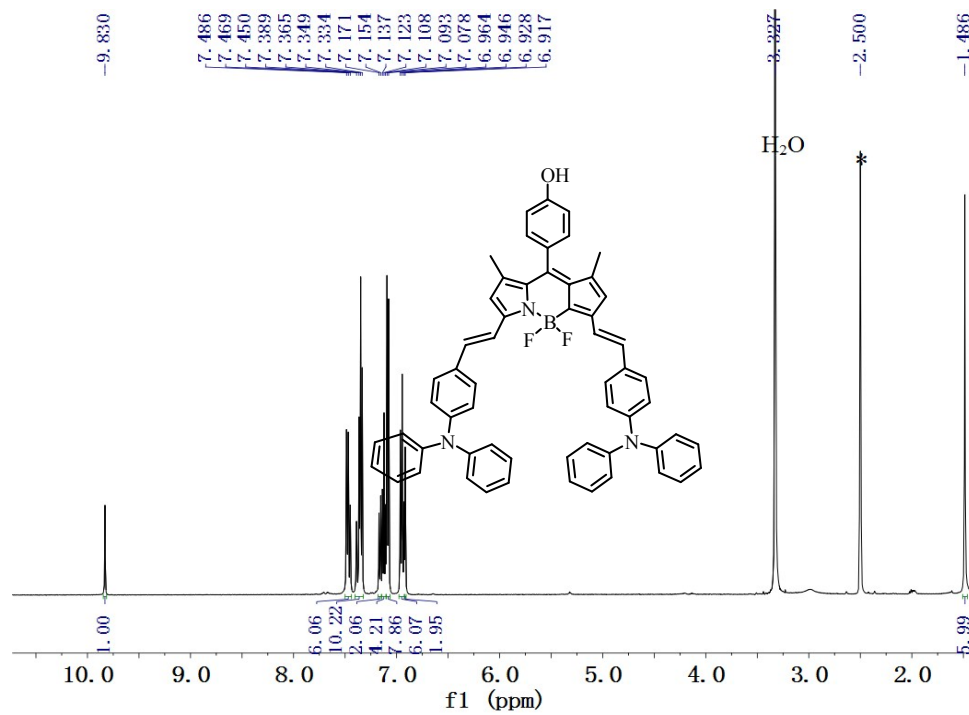

Fig. S6 <sup>1</sup>H NMR spectrum of 3

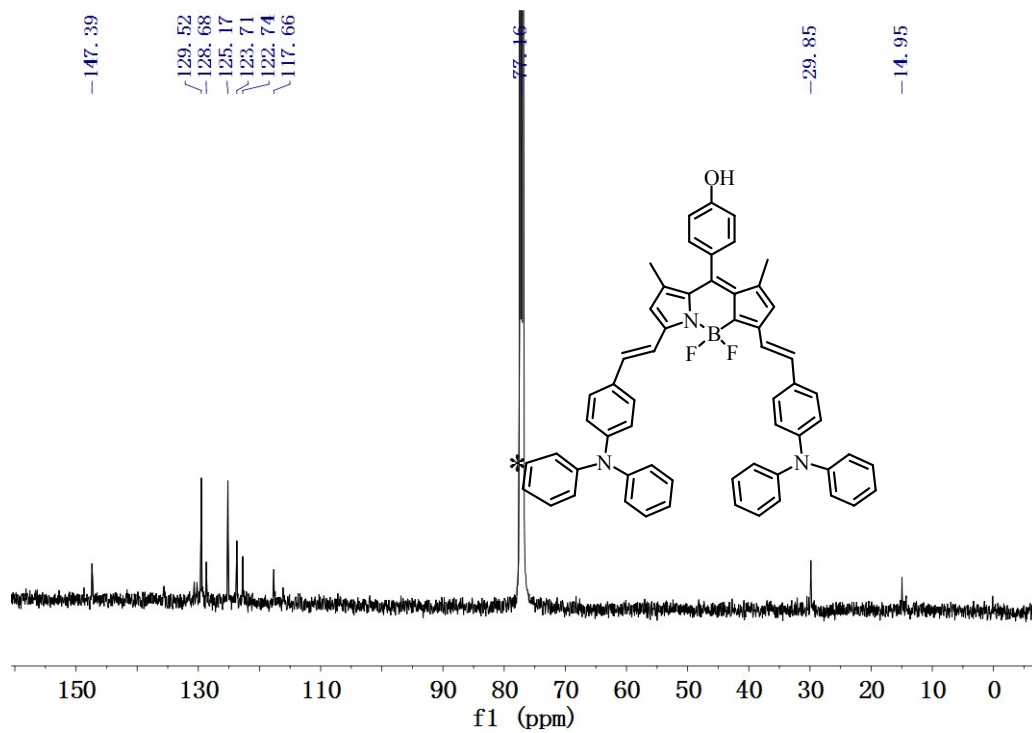

**Fig. S7**  $^{13}\text{C}\{^1\text{H}\}$  NMR spectrum of **3**

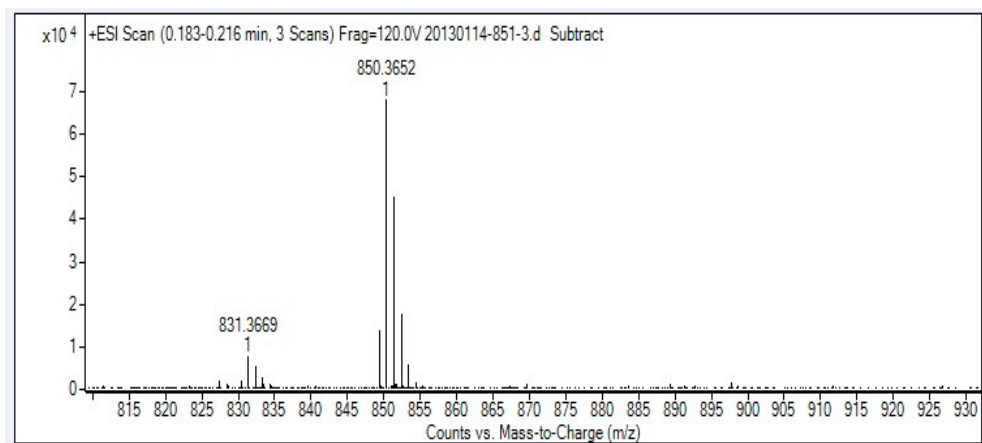

**Fig. S8** HRMS spectrum of **3**

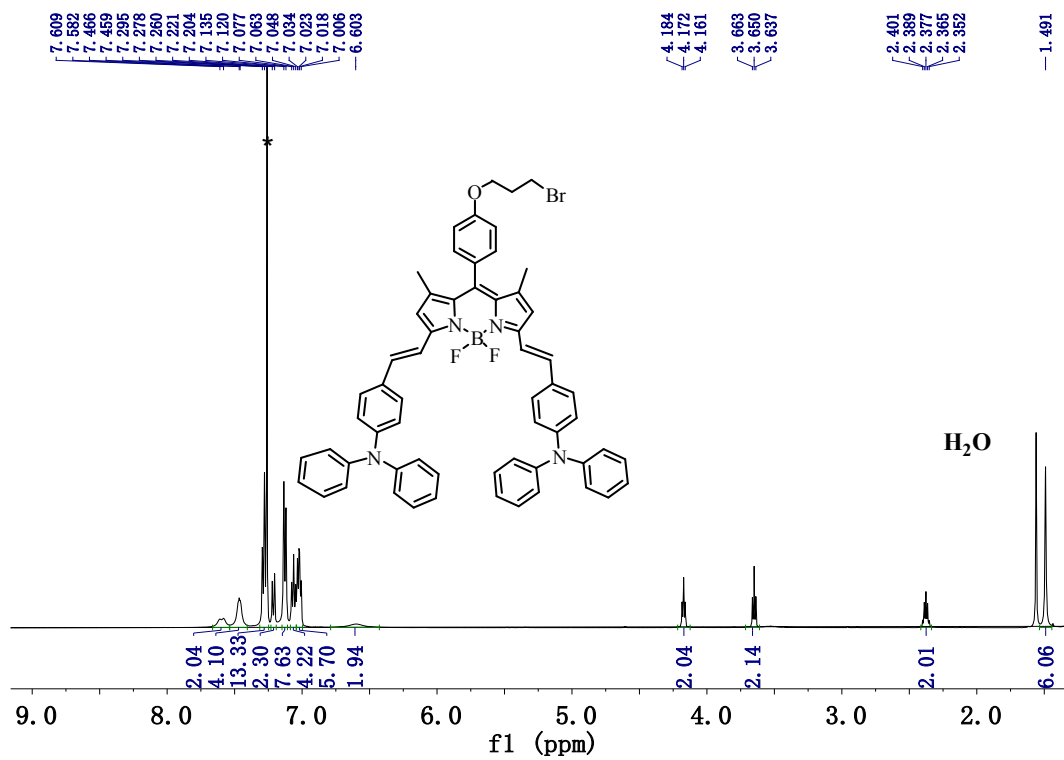

Fig. S9 <sup>1</sup>H NMR spectrum of 4

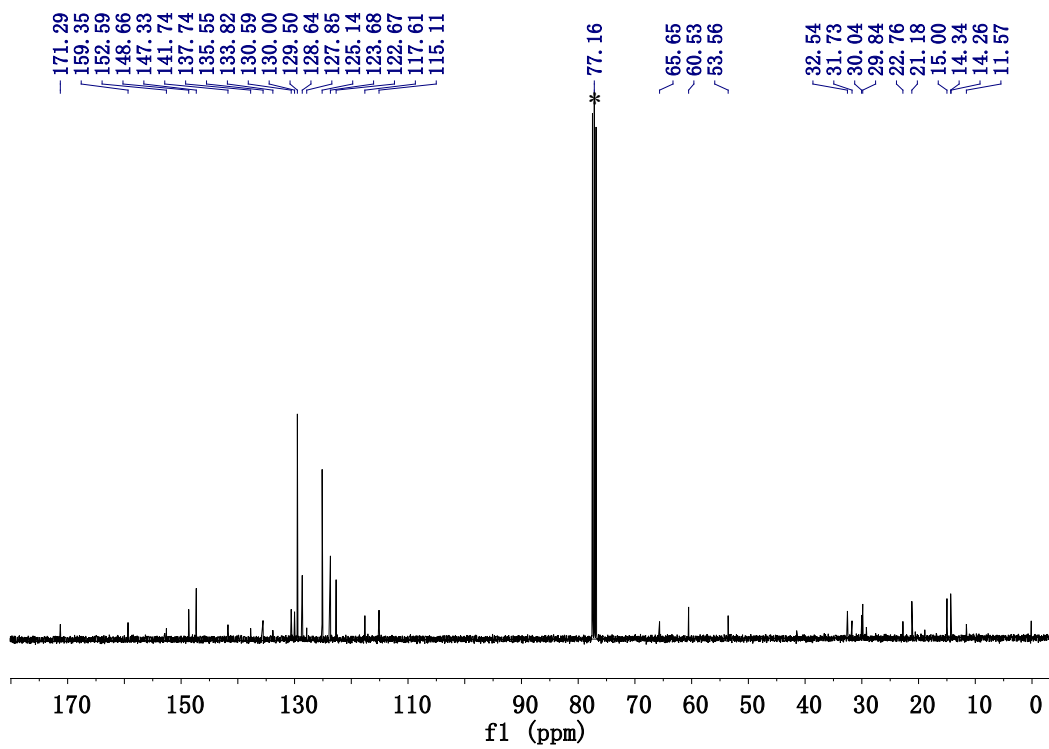

**Fig. S10**  $^{13}\text{C}\{^1\text{H}\}$  NMR spectrum of **4**

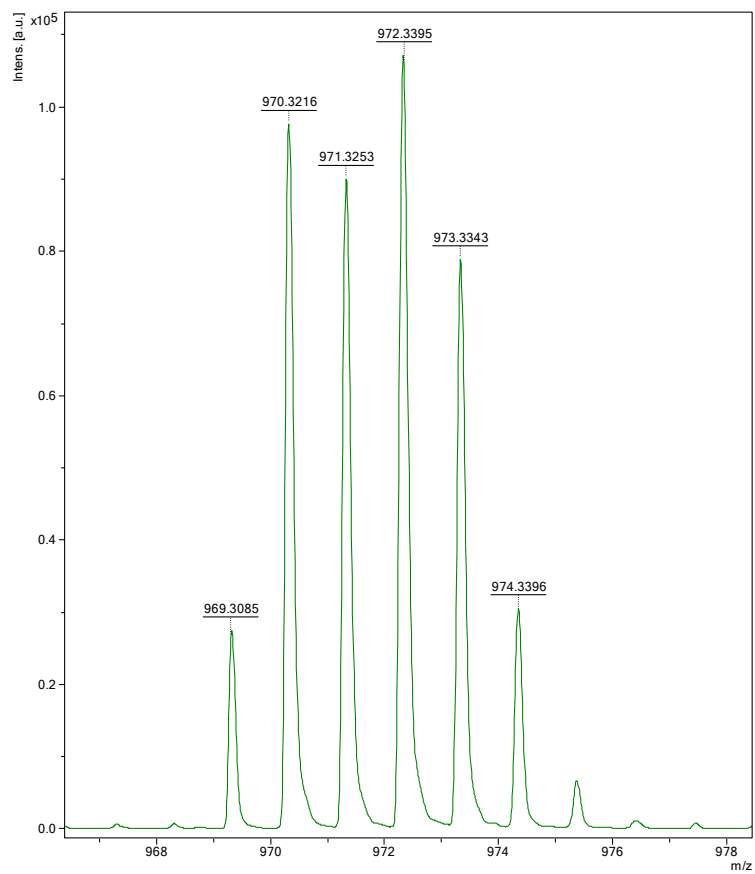

**Fig. S11** HRMS spectrum of **4**

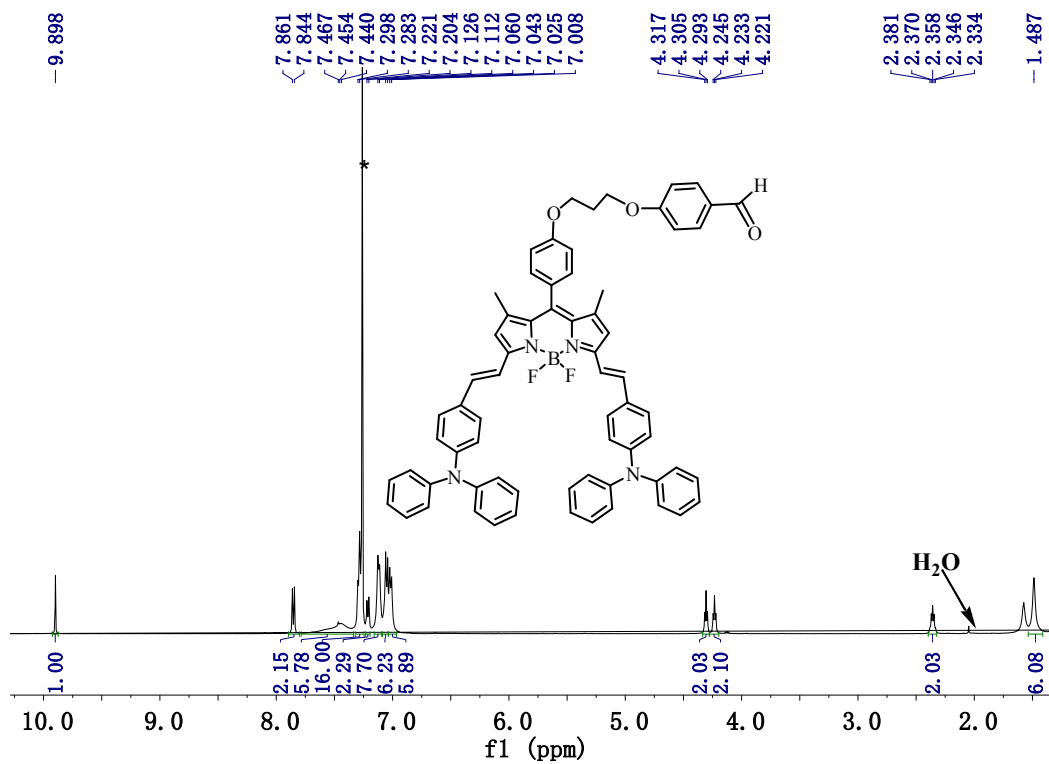

Fig. S12 <sup>1</sup>H NMR spectrum of 5

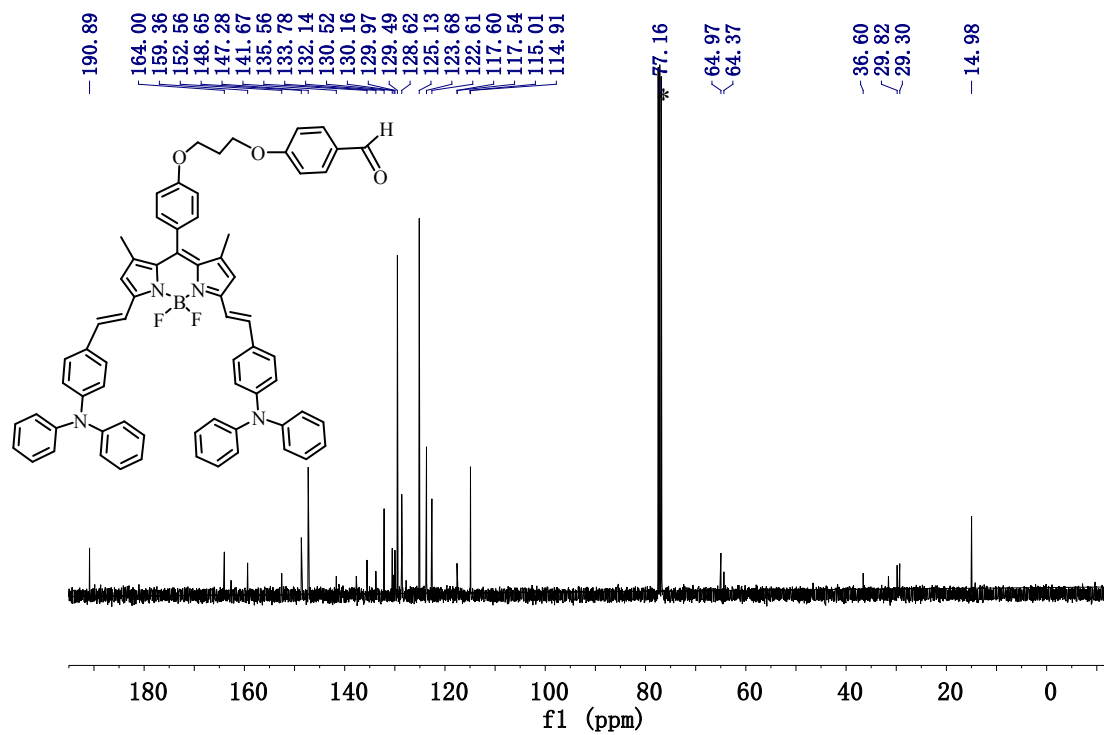

**Fig. S13**  $^{13}\text{C}\{^1\text{H}\}$  NMR spectrum of **5**



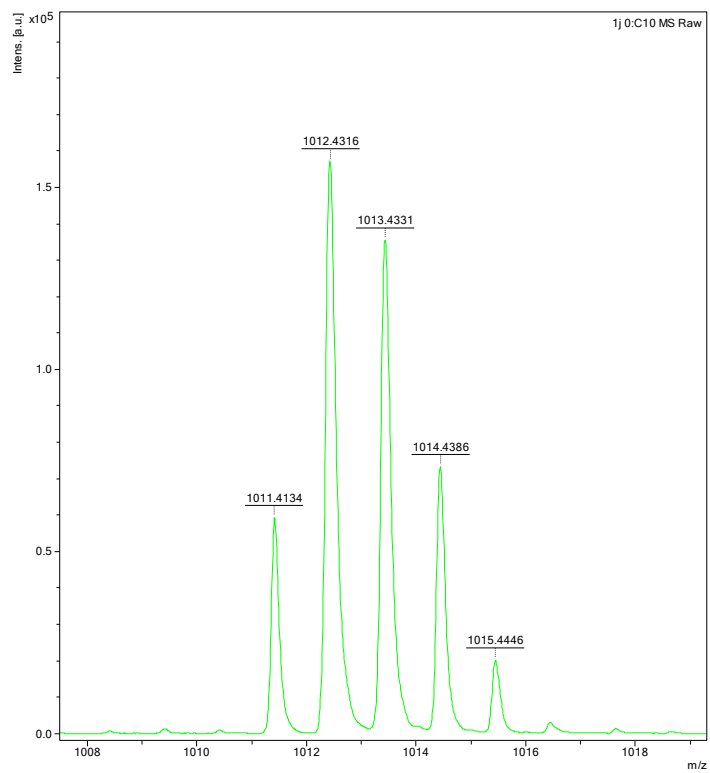

**Fig. S14** HRMS spectrum of **5**

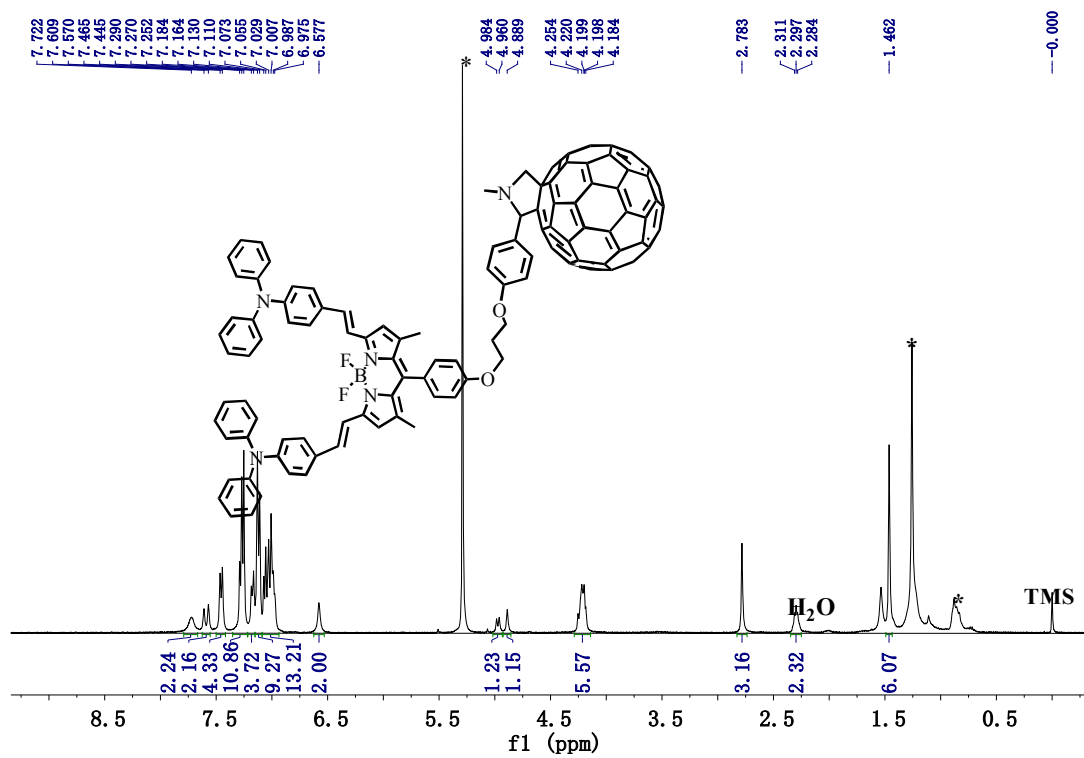

Fig. S15 <sup>1</sup>H NMR spectrum of 6

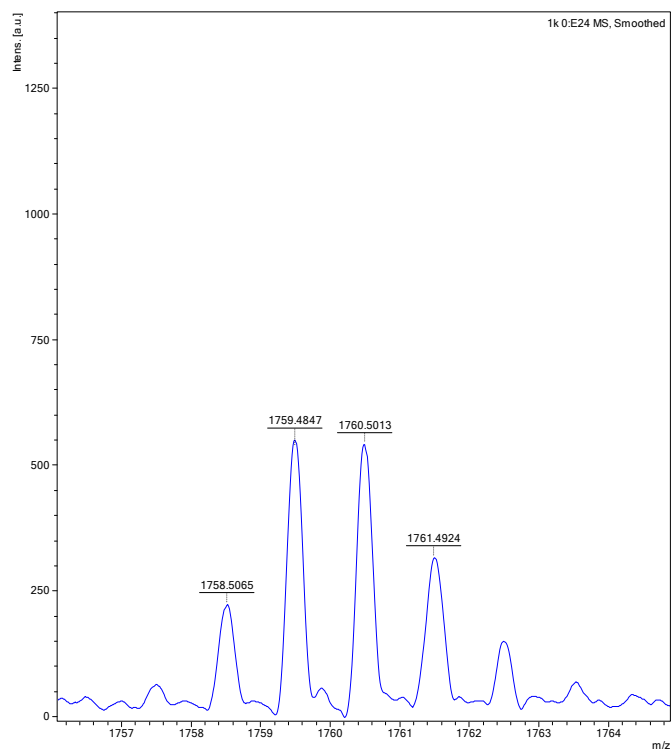

**Fig. S16** HRMS spectrum of **6**

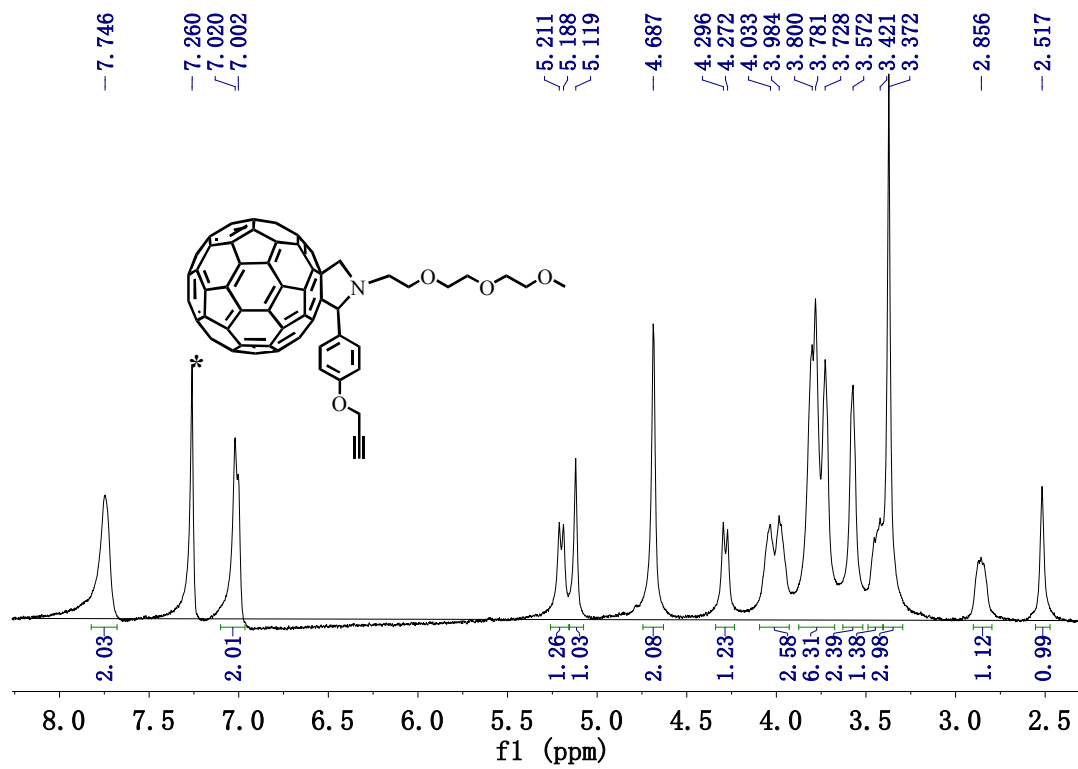

Fig. S17 <sup>1</sup>H NMR spectrum of **9**

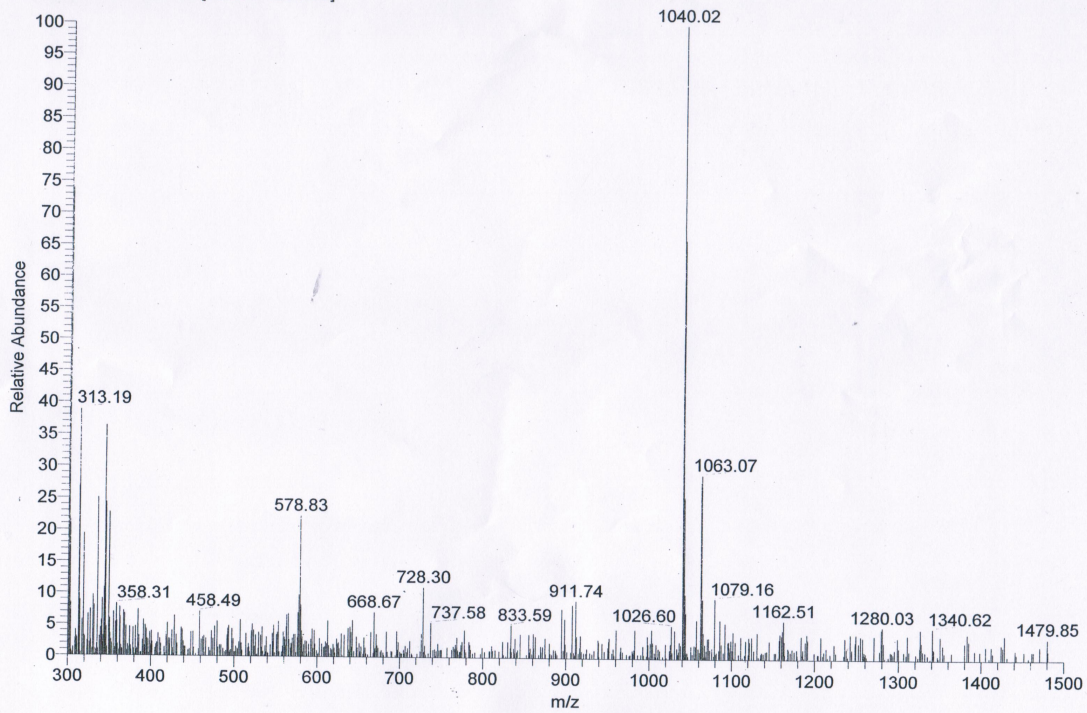

**Fig. S18** MS spectrum of **9**
